# Supplementary material
Source: PubMed Central journal article supplement (PMC6742982)
Supplement: rspb20191583supp2.pdf [file rspb20191583supp2.pdf]

## Electronic Supplementary Material

### **Spatiotemporal ecological niche modelling of multigenerational insect migrations**

Mattia Menchetti, Maya Guéguen, Gerard Talavera \*

**Supplementary Table S2:** Classification of land cover categories in GlobCover.

| <b>Value</b> | <b>Layer</b>                                                                                                                 | <b>open</b> | <b>closed</b> | <b>bareland</b> |
|--------------|------------------------------------------------------------------------------------------------------------------------------|-------------|---------------|-----------------|
| 11           | Post-flooding or irrigated croplands (or aquatic)                                                                            | X           |               |                 |
| 14           | Rainfed croplands                                                                                                            | X           |               |                 |
| 20           | Mosaic cropland (50-70%) / vegetation<br>(grassland/shrubland/forest) (20-50%)                                               | X           |               |                 |
| 30           | Mosaic vegetation (grassland/shrubland/forest) (50-<br>70%) / cropland (20-50%)                                              | X           |               |                 |
| 40           | Closed to open (>15%) broadleaved evergreen or semi-<br>deciduous forest (>5m)                                               |             | X             |                 |
| 50           | Closed (>40%) broadleaved deciduous forest (>5m)                                                                             |             | X             |                 |
| 60           | Open (15-40%) broadleaved deciduous forest/woodland<br>(>5m)                                                                 | X           |               |                 |
| 70           | Closed (>40%) needleleaved evergreen forest (>5m)                                                                            |             | X             |                 |
| 90           | Open (15-40%) needleleaved deciduous or evergreen<br>forest (>5m)                                                            | X           |               |                 |
| 100          | Closed to open (>15%) mixed broadleaved and<br>needleleaved forest (>5m)                                                     |             | X             |                 |
| 110          | Mosaic forest or shrubland (50-70%) / grassland (20-<br>50%)                                                                 | X           |               |                 |
| 120          | Mosaic grassland (50-70%) / forest or shrubland (20-<br>50%)                                                                 | X           |               |                 |
| 130          | Closed to open (>15%) (broadleaved or needleleaved,<br>evergreen or deciduous) shrubland (<5m)                               | X           |               |                 |
| 140          | Closed to open (>15%) herbaceous vegetation<br>(grassland, savannas or lichens/mosses)                                       | X           |               |                 |
| 150          | Sparse (<15%) vegetation                                                                                                     | X           |               |                 |
| 160          | Closed to open (>15%) broadleaved forest regularly<br>flooded (semi-permanently or temporarily) - Fresh or<br>brackish water |             | X             |                 |

|     |                                                                                                                                |   |   |   |
|-----|--------------------------------------------------------------------------------------------------------------------------------|---|---|---|
| 170 | Closed (>40%) broadleaved forest or shrubland permanently flooded - Saline or brackish water                                   |   | X |   |
| 180 | Closed to open (>15%) grassland or woody vegetation on regularly flooded or waterlogged soil - Fresh, brackish or saline water | X |   |   |
| 190 | Artificial surfaces and associated areas (Urban areas >50%)                                                                    | X |   |   |
| 200 | Bare areas                                                                                                                     |   |   | X |

**Supplementary Table S3.** Mean ROC and TSS evaluation scores (10 runs) for all models used in biomod2.

|      | <b>TSS</b> | <b>ROC</b> |
|------|------------|------------|
| RF   | 0.9905     | 0.9972     |
| MARS | 0.9572     | 0.9815     |
| GLM  | 0.9437     | 0.972      |
| GAM  | 0.9773     | 0.9894     |
| GBM  | 0.9766     | 0.9934     |

**Supplementary Table S4.** Mean variable importance scores for each model, converted into percentages. The three most important variables in the final EMca model are shown in bold.

|             | <b>frs</b>   | <b>pre</b> | <b>tmp</b>   | <b>vap</b>   | <b>wet</b> | <b>closed</b> | <b>bareland</b> | <b>open</b> |
|-------------|--------------|------------|--------------|--------------|------------|---------------|-----------------|-------------|
| RF          | 22.46        | 1.38       | 37.66        | 1.76         | 5.34       | 1.84          | 11              | 2.74        |
| MARS        | 50.51        | 1.70       | 5.72         | 7.22         | 2.22       | 0             | 32.63           | 0           |
| GLM         | 15.95        | 2.97       | 29.83        | 25.65        | 12.18      | 0.90          | 4.92            | 7.60        |
| GAM         | 15.32        | 8.35       | 25.27        | 17.92        | 13.65      | 1.44          | 6.92            | 11.12       |
| GBM         | 0.73         | 5.11       | 83.72        | 5.92         | 0.39       | 0.14          | 2.49            | 1.50        |
| <b>EMca</b> | <b>20.41</b> | 4.75       | <b>30.06</b> | <b>17.38</b> | 9.41       | 0.96          | 10.38           | 6.64        |

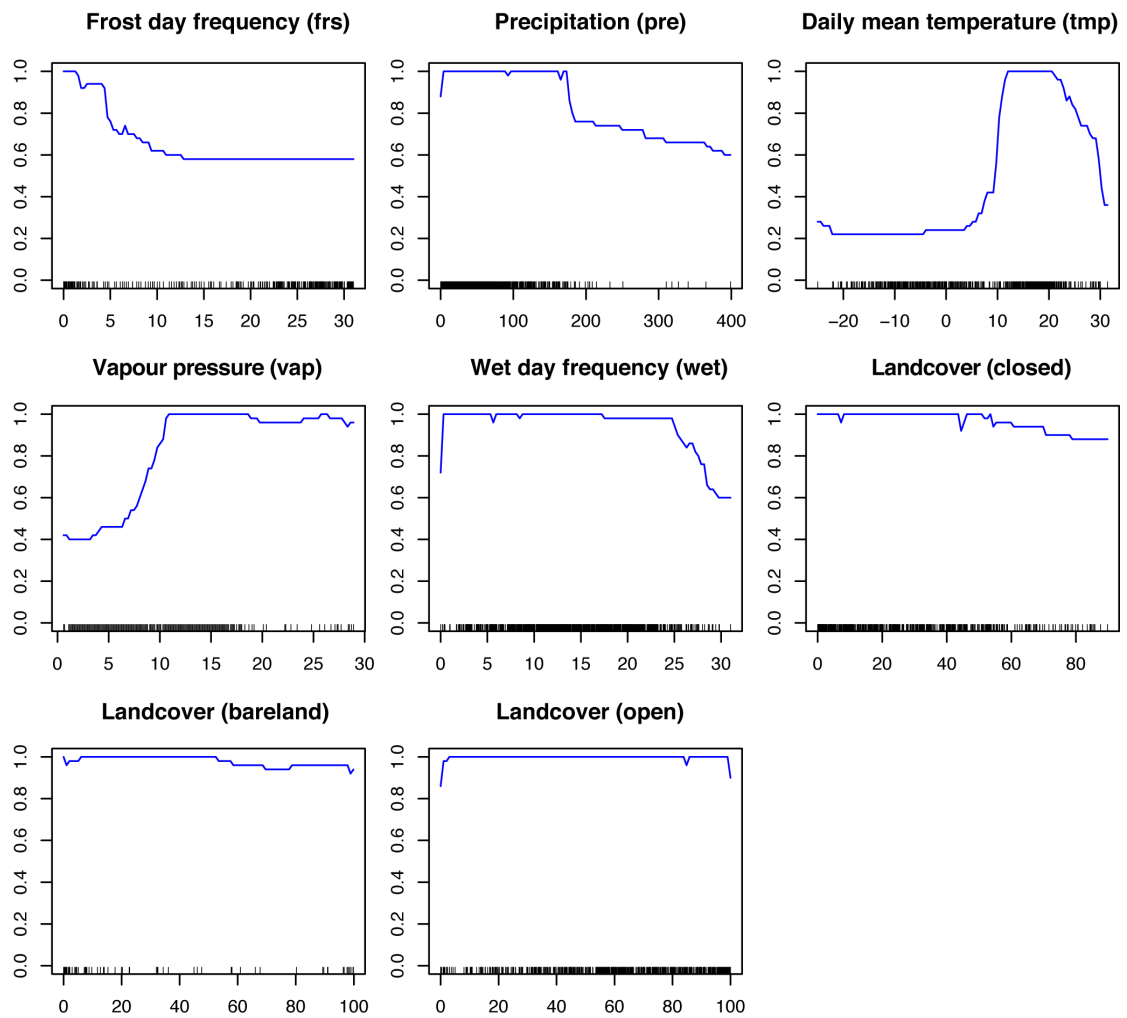

**Supplementary Figure S1.** Response curves of the selected variables used for modelling.

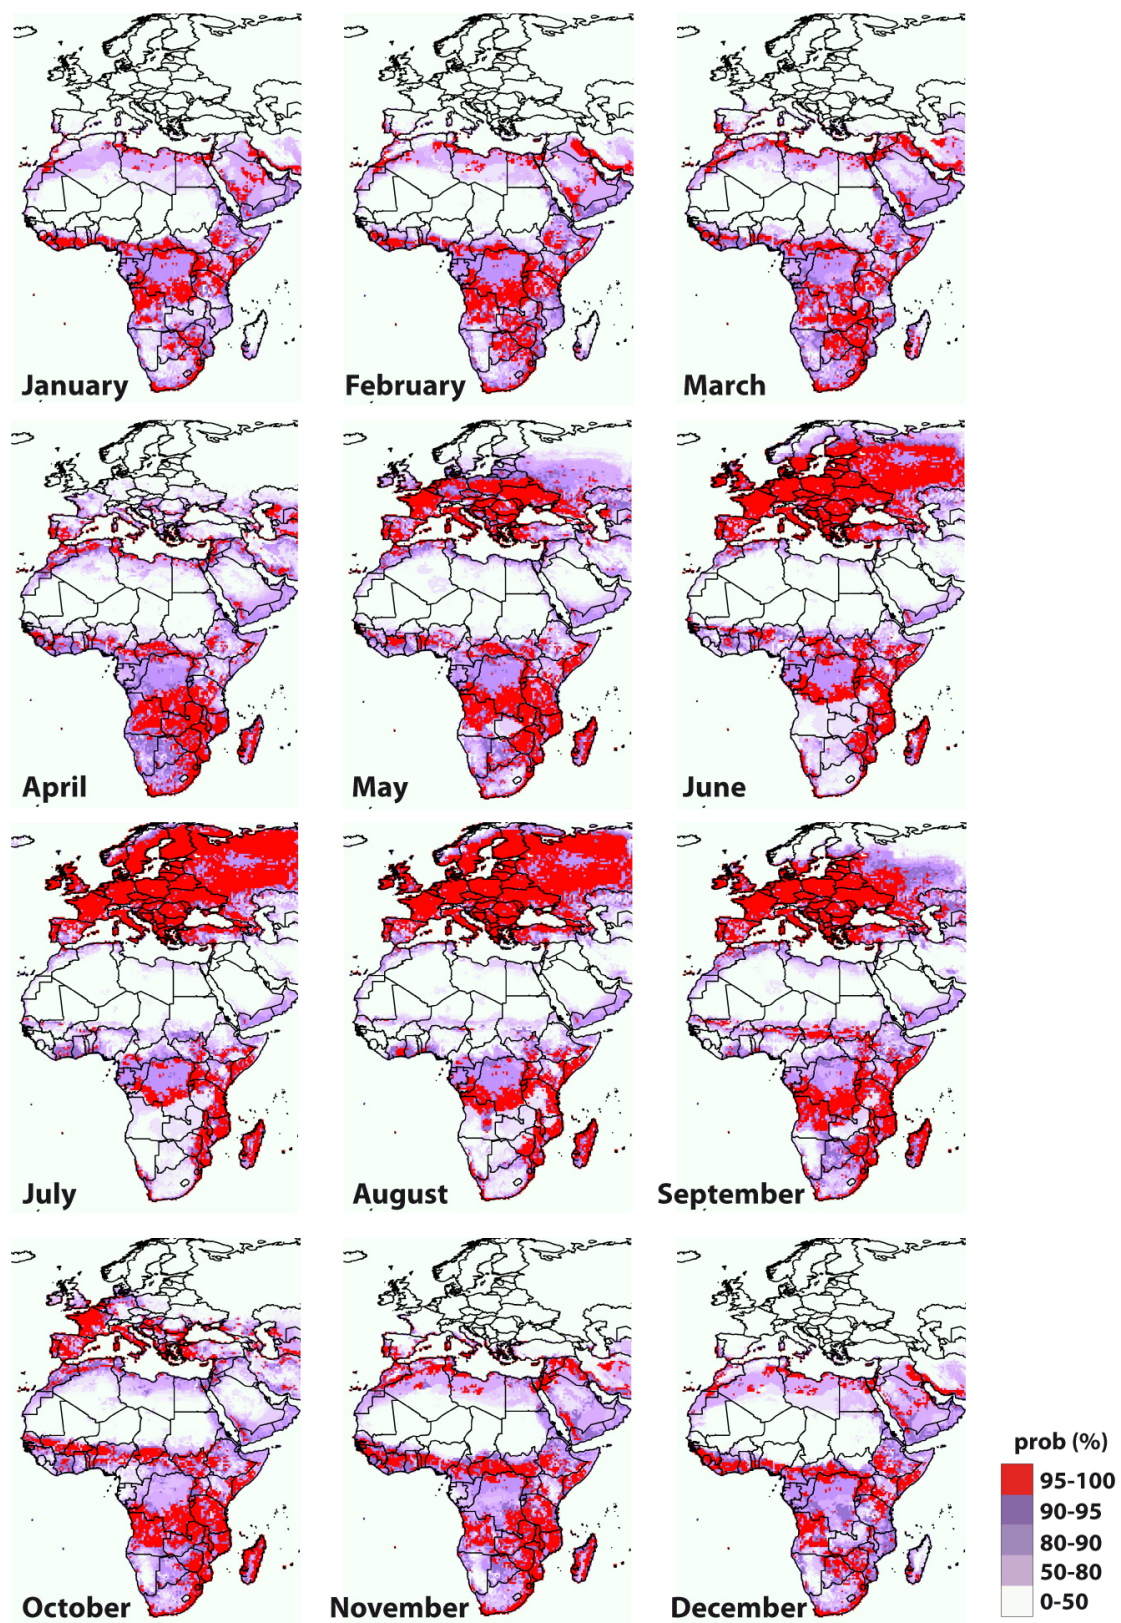

**Supplementary Figure S2.** Monthly projections of the ensembled SDM models, where models were built based on data from the northern hemisphere and projections extended to the southern hemisphere. Colour denotes probabilities from 0 (white) to 100 (red).
